# Supplementary material for: Therapeutic expression of hairpins targeting apolipoprotein B100 induces phenotypic and transcriptome changes in murine liver
Source: PubMed Central journal article supplement — Gene Ther. 2013 Oct 24;21(1):60–70. doi: 10.1038/gt.2013.58 (PMC3881031; doi:10.1038/gt.2013.58), 2013-10-24
Supplement: gt201358x2.pdf [file gt201358x2.pdf]

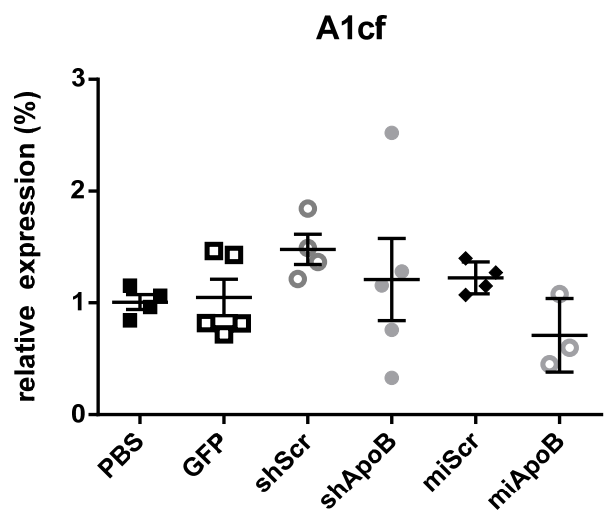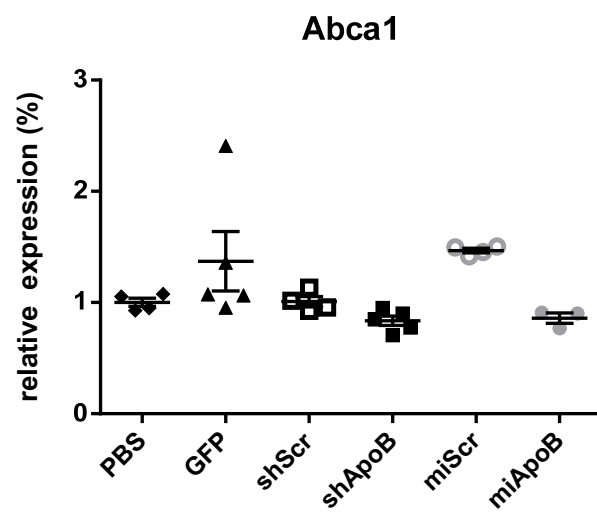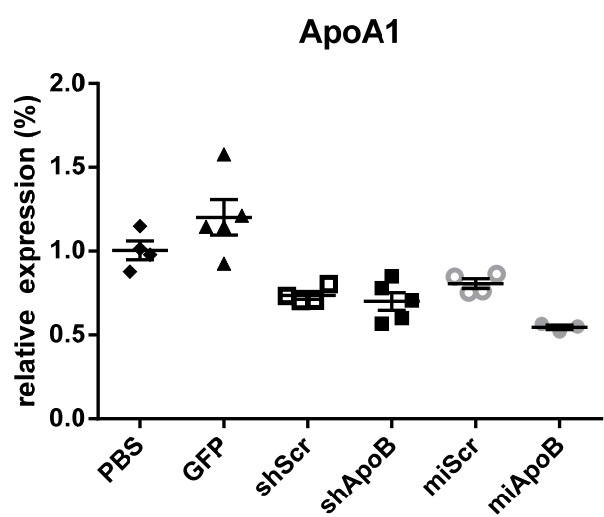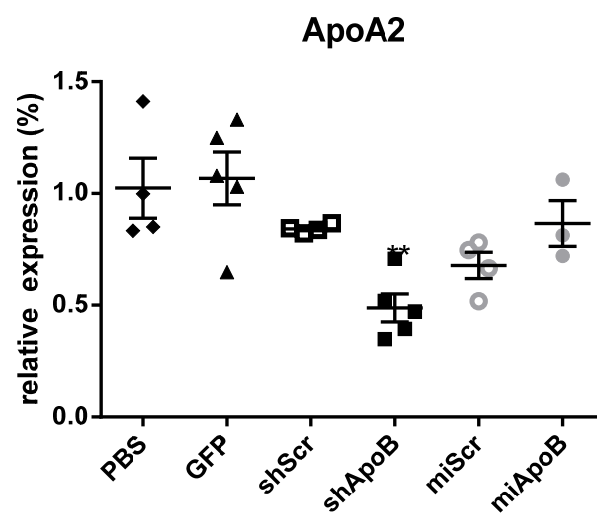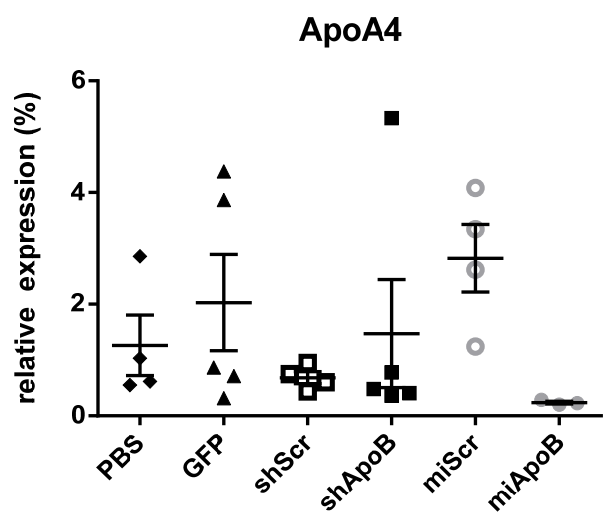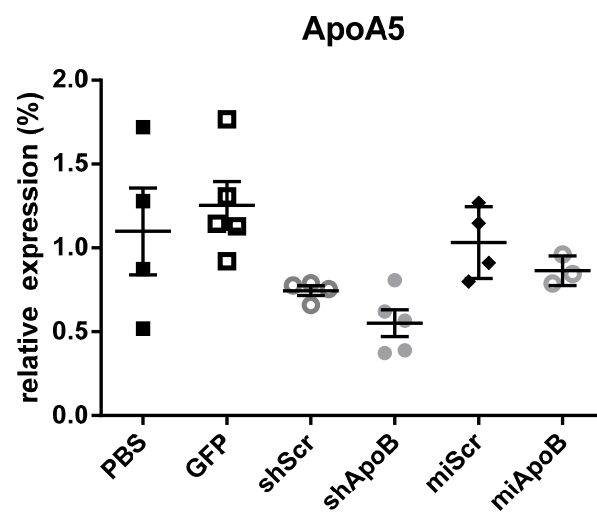

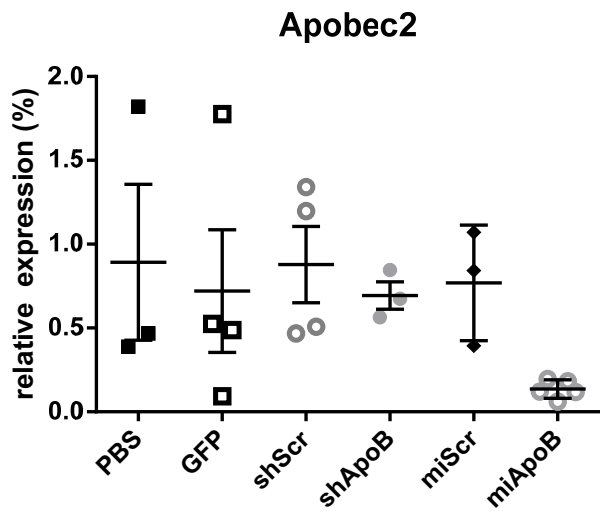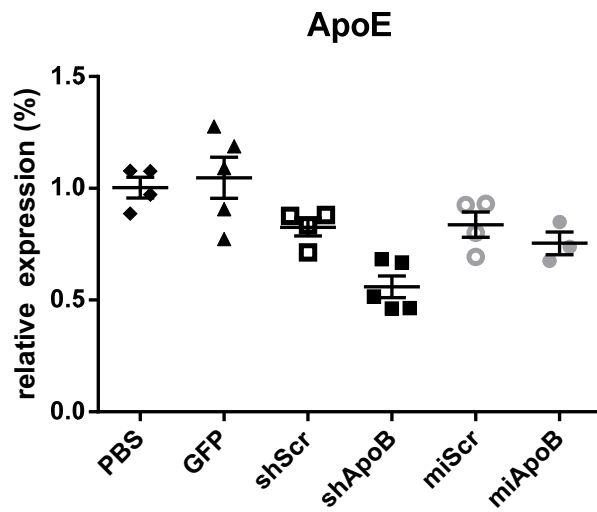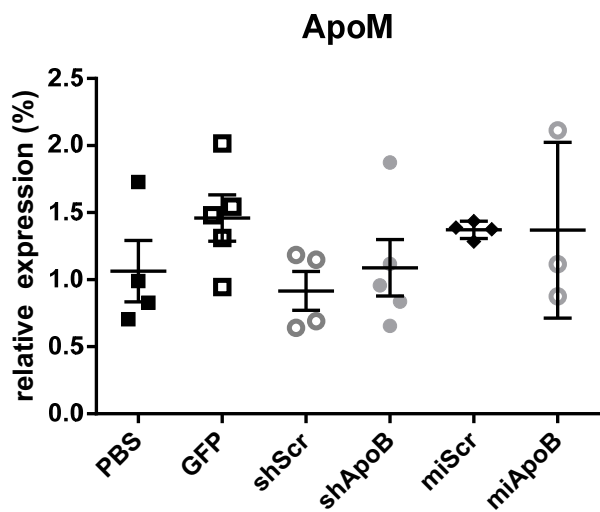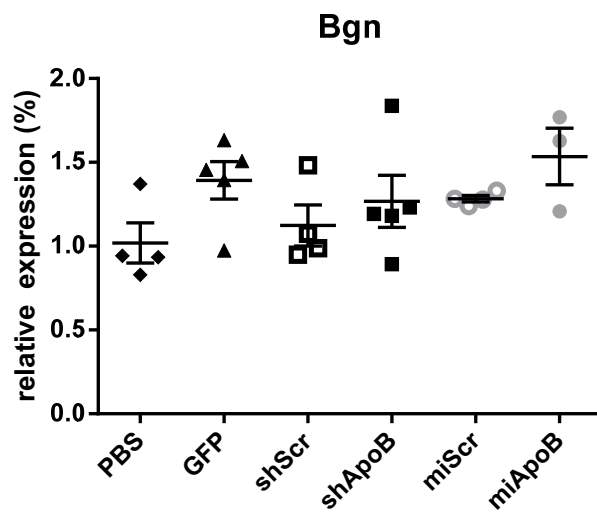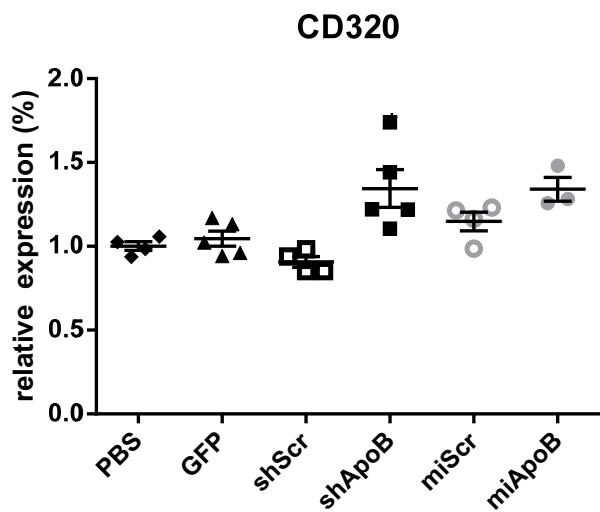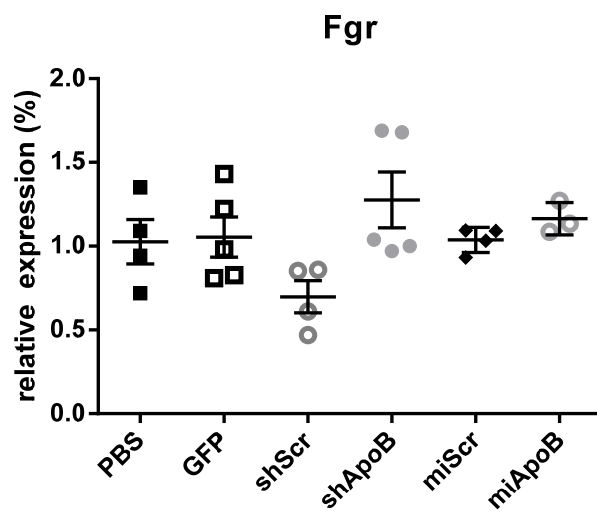

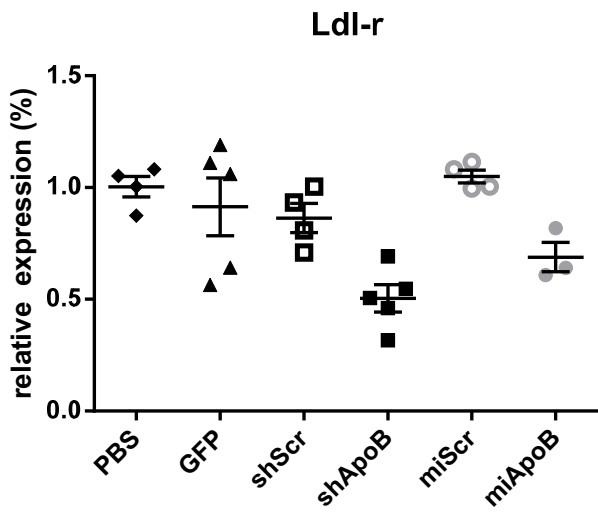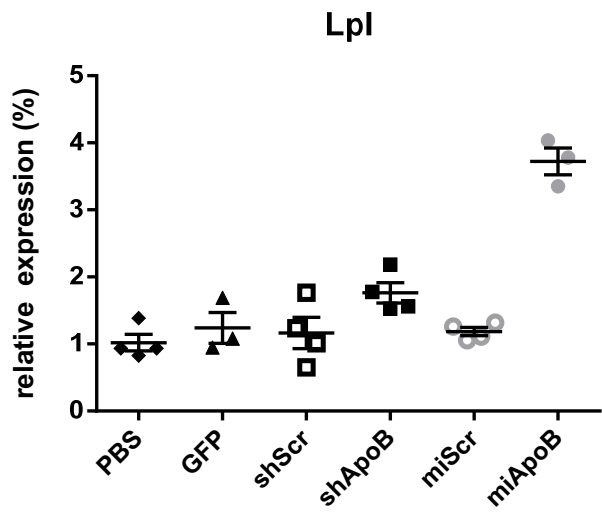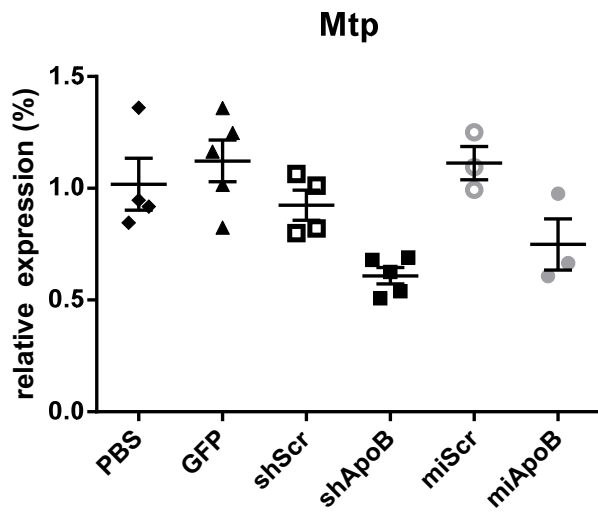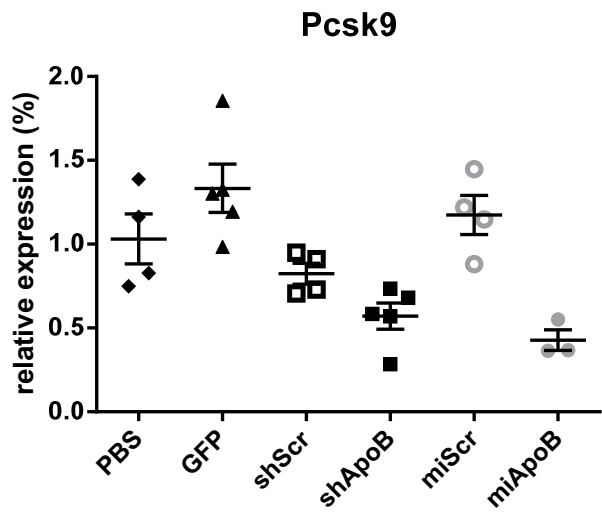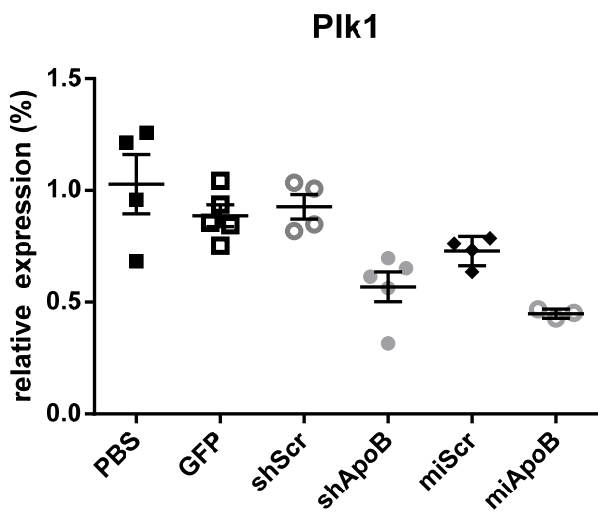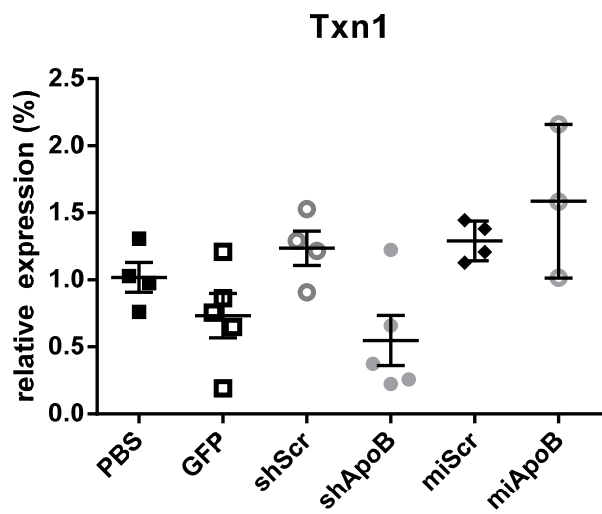

**Supplementary figure 2** *Expression of ApoB partner genes in murine liver 8 weeks p.i. Total RNA was isolated from snap-frozen liver tissues and qRT-PCR was performed with A1cf-, Abca1-, ApoA1-, ApoA2-, ApoA4-, ApoA5-, Apobec2-, ApoE-, ApoM-, Bgn-, CD320-, Fgr-, Ldl-r, Lpl-, Mtp-, Pcsk9-, Plk1-, Txn1- and actin-specific primers. mRNA levels were calculated relative to actin mRNA. Expression levels in the PBS group were set as 100%. Data are represented as individual measurements with mean values  $\pm$ SE plotted.*
